# Supplementary material
Source: publisher figshare collection journal article supplement (https://springernature.figshare.com/ndownloader/files/14512886)
Supplement: Supplementary file 1 [file 14512886]

Additional file 2

**Figure S2.** Reproducibility of LAMP primer set Tub-E198A*.* **a** LAMP products detected with 1,000 × Sybr Green I. **b** Detection of LAMP products by agarose gel electrophoresis. Lane M: DNA 2K plus Marker; tubes and lanes 1-8: E198A mutants; tubes and lanes 9-16: E198K mutants; tubes and lanes 17-24: E198V mutants; tubes and lanes 25-32: wild type; tube and lane 33: ddH2O.
